# Supplementary material for: Establishment of bovine embryonic stem cells after knockdown of CDX2
Source: PubMed Central journal article supplement (PMC4913270; doi:10.1038/srep28343), 2016-06-20
Supplement: srep28343-s1.pdf [file srep28343-s1.pdf]

**Title:** Establishment of bovine embryonic stem cells after knockdown of CDX2

**Authors:** Xia Wu<sup>1,†,\*</sup>, Miao Song<sup>2,3,†</sup>, Xi Yang<sup>3,†</sup>, Xin Liu<sup>1,†</sup>, Kun Liu<sup>1</sup>, Cuihua Jiao<sup>1</sup>, Jinze Wang<sup>1</sup>, Chunling Bai<sup>1</sup>, Guanghua Su<sup>1</sup>, Xuefei Liu<sup>1</sup>, Guangpeng Li<sup>1,\*</sup>

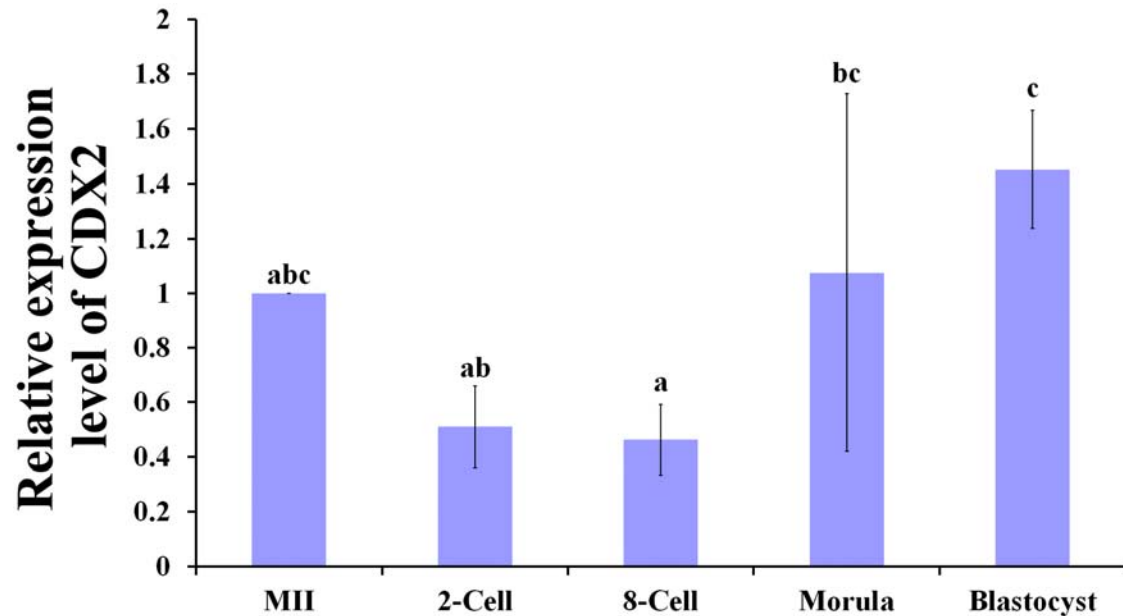

**Supplementary Figure S1** Expression of *CDX2* in bovine MII oocytes and pre-implantation embryos. Quantitative RT-PCR analysis of *CDX2* expression in bovine oocytes (22h IVM) and embryos (156h post-IVF). In each set of experiments, *CDX2* mRNA levels were normalized by  $\beta$ -actin mRNA level. Bars indicate mean $\pm$ SD. <sup>a/b/c</sup>Values with different superscripts differ significantly ( $p < 0.05$ ).

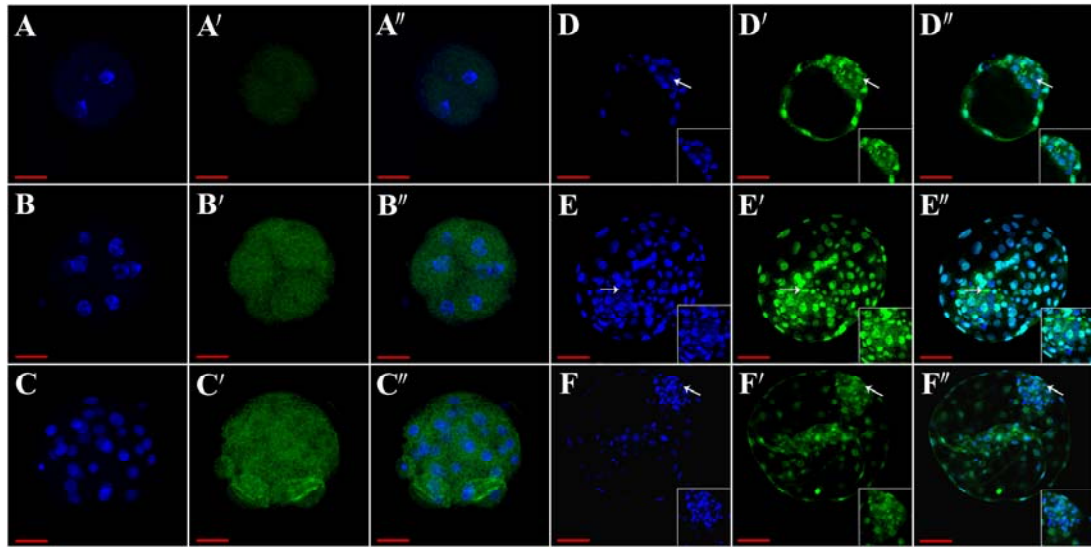

**Supplementary Figure S2** Localization of CDX2 in bovine pre-implantation embryos. The staining patterns of IVF embryos in 2-cell (A, A', A''), 8-cell (B, B', B''), morula (C, C', C''), early blastocyst (D, D', D''), expanded blastocyst (E, E', E'') and hatched blastocyst (F, F', F''). ICM staining was shown in inserted picture. Nuclei are stained with DAPI. Bar = 100 $\mu$ m.

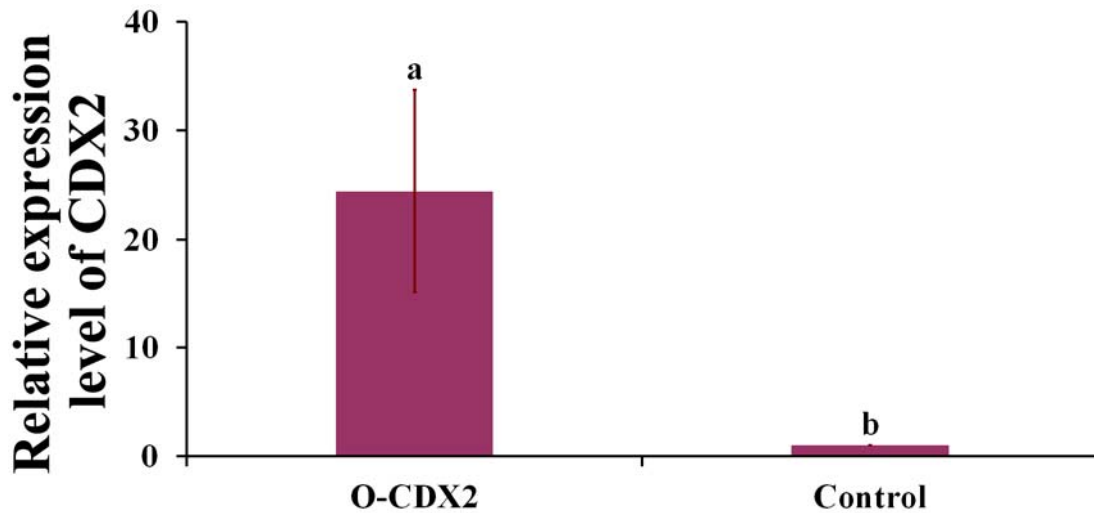

**Supplementary Figure S3** The qRT-PCR analysis of *CDX2* expression in bEFs that was infected with containing *CDX2* over-expression plasmid for 48h. The relative expression of *CDX2* was quantitative analysis after post-infection 48hr. *CDX2* mRNA levels were normalized by  $\beta$ -actin mRNA level. Bars indicate mean $\pm$ SD. <sup>a/b</sup>Values with different superscripts differ significantly ( $P<0.01$ ).

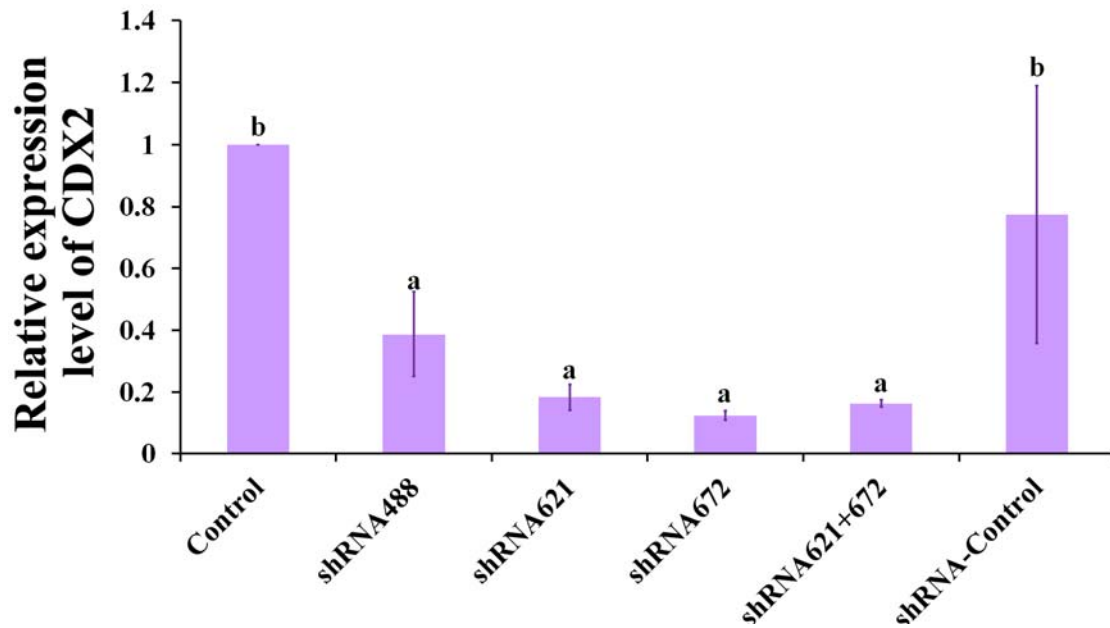

**Supplementary Figure S4** The qRT-PCR analysis of *CDX2* expression in its over-expression bEFs after infecting lentivirus containing *CDX2* knockdown plasmids.

The cells were detected at day one after infection. *CDX2* mRNA levels were normalized by  $\beta$ -actin mRNA level. Bars indicate mean $\pm$ SD. <sup>a/b</sup>Values with different superscripts differ significantly ( $P < 0.01$ ).

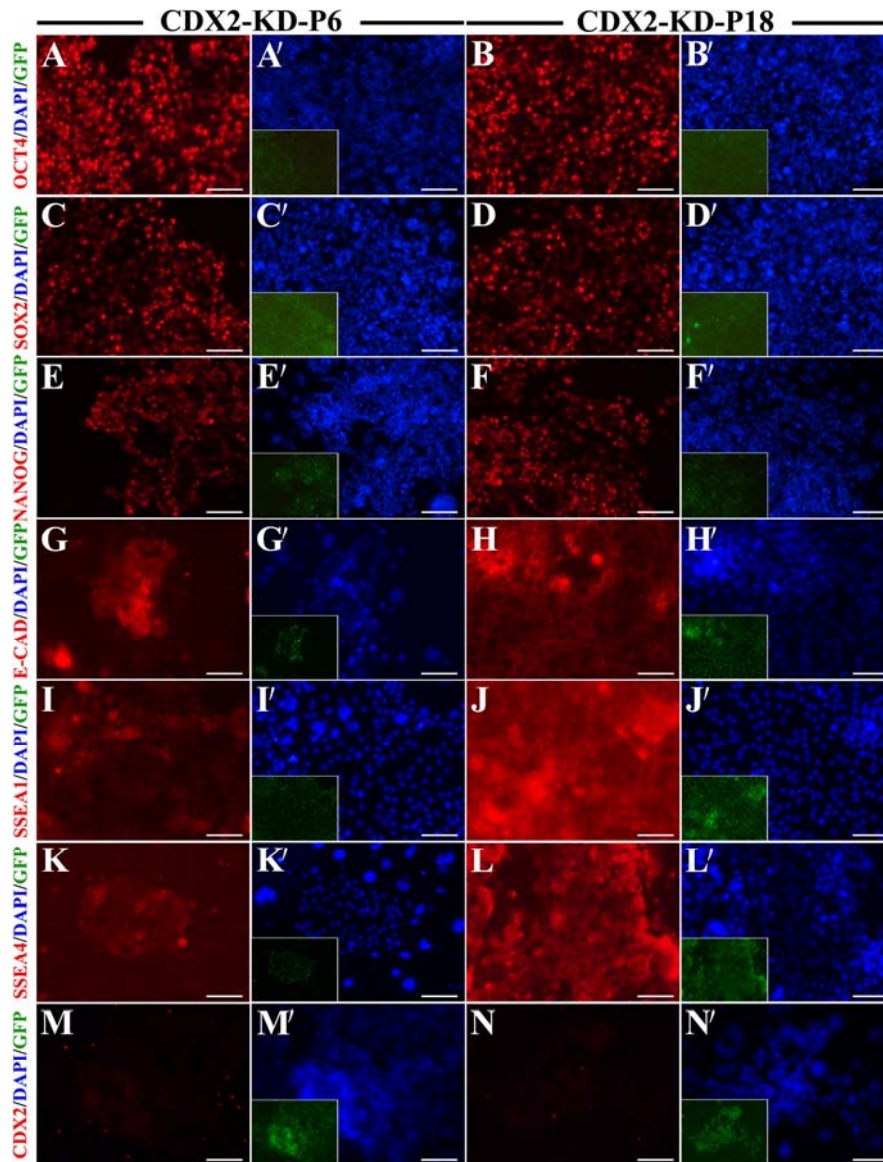

**Supplementary Figure S5** Expression of pluripotent markers and CDX2 in CDX2-KD bESCs at 6 and 18 passages. OCT4 (A, A', B, B'), SOX2 (C, C', D, D'), NANOG (E, E', F, F'), E-CAD (G, G', H, H'), SSEA1 (I, I', J, J'), SSEA4 (K, K', L, L') and CDX2 (M, M', N, N'). GFP expression in CDX2-KD bESCs was shown in inserted picture. Nuclear was stained by DAPI. Bar = 100 $\mu$ m.

|               | No. reconstructed embryos | No. Cleavage (%)   | 8-cell (%)         | Blastocyst (%)    |
|---------------|---------------------------|--------------------|--------------------|-------------------|
| Control       | 271                       | 209(77.12 ± 2.67)a | 124(45.76 ± 8.04)a | 79(29.15 ± 3.36)a |
| shRNA-Control | 242                       | 193(79.75 ± 1.99)a | 105(43.39 ± 3.71)a | 73(30.17 ± 4.26)a |
| shRNA-672     | 266                       | 216(81.2 ± 2.82)a  | 127(47.74 ± 1.1)a  | 70(26.32 ± 1.83)a |

**Supplementary Table S1** Development of cloned embryos derived from CDX2-KD

bEFs

|         | No. Blastocysts | No. P0(%)          | No. >P5(%)         | No. >P10(%)      | No. >P15(%)     | No. >P20(%)      |
|---------|-----------------|--------------------|--------------------|------------------|-----------------|------------------|
| CDX2-KD | 59              | 20(34.2 ± 16.63)a  | 9(15.33 ± 1.01)a   | 6(10.5 ± 4.87)a  | 4(6.8 ± 2.29)a  | 1(1.67 ± 22.36)a |
| Control | 58              | 25(42.12 ± 11.41)a | 14(29.33 ± 21.13)a | 6(10.07 ± 3.43)a | 2(3.27 ± 2.31)a | 0(0)a            |

**Supplementary Table S2** Isolation and cultivation of bESCs from CDX2-KD and

control blastocysts

| <b>Fu</b> ctional Sites in <i>CDX2</i> (bp) | <b>F</b> orward Sequence of shRNA                 | <b>R</b> everse complementary Sequence of shRNA      |
|---------------------------------------------|---------------------------------------------------|------------------------------------------------------|
| <b>448-506</b>                              | AACGGAACCTGTGCGAGT                                | TCGAGAAAAAAGGAACCTG                                  |
|                                             | GGATTTC AAGAGAATCCA<br>CTCGCACAGGTTCTTTTT<br>TC   | TGCGAGTGGATTCTCTTGA<br>AATCCACTCGCACAGGTT<br>CGTT    |
| <b>621-640</b>                              | AACGCAGTCGCTATATCAC                               | TCGAGAAAAAAGCAGTCGC                                  |
|                                             | CATCTTCAAGAGAGATGG<br>TGATATAGCGACTGCTTTT<br>TTC  | TATATCACCATCTCTCTTGA<br>AGATGGTGATATAGCGACTG<br>CGTT |
| <b>672-691</b>                              | AACGCTCTCAGAGAGGCA                                | TCGAGAAAAAAGCTCTCAG                                  |
|                                             | GGTTATTCAAGAGATAAC<br>CTGCCTCTCTGAGAGCTT<br>TTTTC | AGAGGCAGGTTATCTCTTG<br>AATAACCTGCCTCTCTGAG<br>AGCGTT |
| <b>Scramble</b>                             | AACGAGGTGGTTCGATGA                                | TCGAGAAAAAAGAGGTGGT                                  |
|                                             | CTCATTCAAGAGATGAGT<br>CATCGAACCACCTCTTTTT<br>TC   | TCGATGACTCATCTCTTGAA<br>TGAGTCATCGAACCACCTC<br>GTT   |

**Supplementary Table S3** shRNA for silencing *CDX2* in this study

| <b>Gene</b>  | <b>F</b> orward Primer    | <b>R</b> everse Primer    |
|--------------|---------------------------|---------------------------|
| <b>OCT4</b>  | TGGGTCGGGAGGGTTAGAGT      | CAACAAC TCACTCGCCTCCTC    |
| <b>SOX2</b>  | GCGTTTTTTTTTTTATTTTAGTAGT | ACTTTCCCCCTTTTACAAACA     |
| <b>NANOG</b> | AGGGATTGAAGGTTATTTGTTTT   | TATCCAAACATCCAAAAATTA AAA |
| <b>CDX2</b>  | TGGAGGGGCGTAGGGTTTA       | ACTCCTACGCCGACGAACAA      |

**Supplementary Table S4** Primers used in this study for DNA Methylation Analyses

| Gene                              | Forward Primers (5'→3') | Reverse Primers (5'→3') | Amplicon Size<br>in bp | Gene ID        |
|-----------------------------------|-------------------------|-------------------------|------------------------|----------------|
| <b>Real-time PCR Primers</b>      |                         |                         |                        |                |
| OCT4                              | CAAATTAGCCACATCGCC      | AGCCTCAAATCCTCACG       | 126                    | NM_174580.2    |
| SOX2                              | TCAGATGCAGCCCATGCAC     | GGTGCCCTGCTGAGAATAGGAC  | 121                    | NM_001105463.1 |
| NANOG                             | ATCTGCTGACACCCTCGACAC   | GGGTCTGCGAGAACAGTTCTAA  | 193                    | NM_001025344.1 |
| CDX2                              | AGTGAAAACCAGGACGAAAGA   | CTCTGAGAGCCCCAGCGT      | 142                    | XM_871005.3    |
| TEAD4                             | AAGTTCTGGGCAGACCTCAA    | GTGCTTCAGCTTGTGGATGA    | 249                    | XM_605145.3    |
| GATA3                             | ATGAAACCGAAACCCGATG     | TTCACAGCACTAGAGAGACC    | 185                    | NM_001076804.1 |
| IFN-T                             | GATCCTTCTGGAGCTGGYTG    | GCCCGAATGAACAGACTCYC    | 100                    | NM_001168275.1 |
| β-ACTIN                           | CTGTTAGCTGCGTTACACCCTT  | TGCTGTCACCTTCACCGTTC    | 165                    | AY141970.1     |
| <b>Semi-Quantitiy RCR Primers</b> |                         |                         |                        |                |
| NESTIN                            | CGCATGAATGGGGGCGTGGT    | TTTGGAAGGGCCGCTGAGCC    | 565                    | JN180938       |
| CYTOKERATIN-8                     | GTCTCCAGGCTGAGATCGAG    | TCCAGCAGCTTCCTGTAGGT    | 241                    | NM_001033610.1 |
| β3-TUBLIN                         | CATCCAGAGCAAGAACAGCAG   | GATTCCTCCTCATCGTCTTCG   | 336                    | NM_001077127   |
| T                                 | TGATCACCAGCCACTGCTTC    | CAGCATATCTTTGTGATCGC    | 149                    | NM_001192985   |
| MSX1                              | GGAATCCTCAAAGTCCAGCA    | TACTGCTTCTGGCGGAACTT    | 224                    | NM_174798      |
| BMP4                              | GGTAACCGAATGCTGATGGT    | CTGGGATGTTCTCCAGATGT    | 385                    | NM_001045877.1 |
| GATA4                             | AAGTCCTTCTCCCCTGTTTCC   | GAGCAGAATCACCAAGAGCAG   | 383                    | XM_005209826.2 |
| HNF4                              | ACATCCCAGCCTTCTGTGAG    | TCGTCAATCTGCAGCTCTTG    | 238                    | AF250028       |
| AFP                               | TCTTCCCCATGTTCTTCAGG    | TTTCACGGCAAATTTCTTCC    | 205                    | NM_001034262   |
| ELF5                              | GCTTGAAAACAAGTGGCATC    | TCTTCCTTTGTCCCCACATC    | 207                    | NM_001024569.1 |
| HAND1                             | ACATCGCCTACCTGATGGAC    | TAAGTCCAGCGCCAGACT      | 215                    | NM_001075761.1 |
| MASH2                             | CGACCGGAGTCCCAGCA       | GCTCAACTTCTTGCTGGCAC    | 189                    | DQ381723.1     |
| GAPDH                             | TCAAGAAGGTGGTGAAGCAG    | CCCAGCATCGAAGGTAGAAG    | 122                    | GU324291.1     |

**Supplementary Table S5** Semi-Quantitiy RCR and Real-time PCR primers
